# Supplementary material
Source: HighWire-hosted journal article supplement (https://bmjopen.bmj.com/content/10/3/e033483)
Supplement: inline-supplementary-material-1 [file inline-supplementary-material-1.pdf]

**Appendix 1: Tables giving details of models**

**Index**

- Table 1.1: Search strategy of the rapid reviews**
- Table 1.2: Measures of intermediate hyperglycaemia used in Markov chain models**
- Table 1.3: Data sources of estimates used by our Markov Chain models**
- Table 1.4: Ratios used for comparing different estimates**
- Table 1.5: The three sets of transition probabilities used in different models**

Table 1.1: Search strategy of the rapid reviews

| <b>Epidemiological models</b> |                                                                                                                                                                                                                                                                                                                                                                                               |
|-------------------------------|-----------------------------------------------------------------------------------------------------------------------------------------------------------------------------------------------------------------------------------------------------------------------------------------------------------------------------------------------------------------------------------------------|
| <b>Web of Science</b>         | from All Databases<br>You searched for: TOPIC: ("diabet*" OR "type 2 diabetes" OR "diabetes mellitus") AND TITLE: ("Engl*" OR "United Kingdom" OR "UK") AND TOPIC: ("model" OR "simulation" OR "project*") AND TOPIC: ("epidemiolog*" OR "prevalence" OR "incidence" OR "trend*") NOT TITLE: ("child*")<br>Refined by: LANGUAGES: ( ENGLISH )<br>Timespan: All years.<br>Search language=Auto |
| <b>PubMed</b>                 | (((((("diabet*" OR "type 2 diabetes" OR "diabetes mellitus")) AND ("Engl*" OR "UK" OR "United Kingdom")) AND ("model" OR "simulation" OR "project*")) AND ("epidemiolog*" OR "prevalence" OR "incidence" OR "trend*")) NOT "child*" AND Humans[Mesh]) AND Humans[Mesh] AND English[lang] AND (Humans[Mesh] AND English[lang]))                                                                |
| <b>Markov chain models</b>    |                                                                                                                                                                                                                                                                                                                                                                                               |
| <b>Web of science</b>         | TITLE: ("diabet*" OR "type 2 diabetes" OR "diabetes mellitus" OR "pre-diabetes" OR "prediabetes") AND TITLE: ("economic evaluation" OR "cost-effectiveness" OR "cost effectiveness" OR "cost-utility" OR "cost utility") AND TOPIC: ("Markov") NOT TOPIC: ("child*")<br>Refined by: LANGUAGES: ( ENGLISH )<br>Timespan: All years.<br>Search language=Auto                                    |
| <b>PubMed</b>                 | ((("diabet*" OR "type 2 diabetes" OR "diabetes mellitus" OR "prediabetes" OR "pre-diabetes") AND ("economic evaluation" OR "cost-effectiveness" OR "cost effectiveness" OR "cost-utility" OR "cost utility")) AND "Markov" NOT "child") AND ("humans"[MeSH Terms] AND English[lang]))                                                                                                         |

**Table 1.2: Measures of intermediate hyperglycaemia used in Markov chain models**

| Measure of intermediate hyperglycaemia | Definition                                                                                                                                                                                                                                                                                                                                                                                                                         |
|----------------------------------------|------------------------------------------------------------------------------------------------------------------------------------------------------------------------------------------------------------------------------------------------------------------------------------------------------------------------------------------------------------------------------------------------------------------------------------|
| Impaired Fasting Glucose (IFG)         | <ul style="list-style-type: none"> <li>Diagnosed with an Oral Glucose Tolerance Test (OGTT) performed after an overnight fast</li> <li>Defined by a Fasting Plasma Glucose (FPG) concentration of <ul style="list-style-type: none"> <li>5.6-6.9 mmol/L according to the American Diabetes Association (ADA)[1]</li> <li>6.0-6.9 mmol/L according to the World Health Organization (WHO)[2]</li> </ul> </li> </ul>                 |
| Impaired Glucose Tolerance (IGT)       | <ul style="list-style-type: none"> <li>Diagnosed with a 2-hour Glucose Tolerance Test (2hrGTT), i.e. a blood test performed 2 hours after a 75-g glucose load</li> <li>Defined by 2-h plasma glucose concentration of <ul style="list-style-type: none"> <li>7.8-11 mmol/L according to the American Diabetes Association (ADA)[1]</li> <li>7-11 mmol/L according to the World Health Organization (WHO)[2]</li> </ul> </li> </ul> |
| Glycated Haemoglobin (HbA1c)           | <ul style="list-style-type: none"> <li>Diagnosed with the HbA1c test, measuring the average blood glucose over 2-3 months</li> <li>Defined by HbA1c concentration of <ul style="list-style-type: none"> <li>39-47 mmol/mol (5.7-6.4%) according to the American Diabetes Association (ADA)[1]</li> <li>42-47 mmol/mol (6.0-6.4%) according to the World Health Organization (WHO)[3]</li> </ul> </li> </ul>                        |

**Table 1.3: Data sources of estimates used by our Markov Chain models**

| <b>Estimate</b>                                                             | <b>Year(s)</b>                                | <b>Source</b>                       |
|-----------------------------------------------------------------------------|-----------------------------------------------|-------------------------------------|
| Estimated prevalence of intermediate hyperglycaemia (based on HbA1c)        | 2015                                          | Public Health England[4]            |
| Estimated prevalence of diabetes (both types)                               | 2015                                          | Public Health England[5]            |
| Estimated prevalence of normoglycaemia: residual of the population for 2015 | 2015                                          | Office of National Statistics[6]    |
| Age distributions for those with intermediate hyperglycaemia & diabetes     | Five years of combined data from 2009 to 2013 | Health Surveys for England (HSE)[7] |
| Mortality rates by age                                                      | 2015                                          | Office of National Statistics[6]    |
| Hazard ratios for those with diabetes & T2D                                 | 2015-16                                       | National Diabetes Audit[8]          |
| Hazard ratios for those for those with intermediate hyperglycaemia          | Various years                                 | Systematic review[9]                |

**Table 1.4: Ratios comparing different estimates**

| Numerator                                                           | Denominator                                                    | Ratio                                                                                               | Sources |
|---------------------------------------------------------------------|----------------------------------------------------------------|-----------------------------------------------------------------------------------------------------|---------|
| Diagnosed prevalence of diabetes                                    | True prevalence of diabetes                                    | 75%                                                                                                 | [10,11] |
| Prevalence of T2D                                                   | Prevalence of diabetes                                         | 90%                                                                                                 | [12]    |
| Prevalence of diabetics aged over 80 (England) in 2015, 2030 & 2035 | Prevalence of diabetics aged 20 to 79 (England) in 2030 & 2035 | <ul style="list-style-type: none"><li>• 2015: 18%</li><li>• 2030: 26%</li><li>• 2035: 29%</li></ul> | [6, 7]  |

**Table 1.5: The three sets of transition probabilities used in different models**

|                                                          | <b>Model 1*</b> | <b>Model 2**</b> | <b>Model 3***</b> |
|----------------------------------------------------------|-----------------|------------------|-------------------|
| Normoglycaemia – Normoglycaemia                          | 0.925           | 0.925            | 0.831             |
| Normoglycaemia – Intermediate hyperglycaemia             | 0.069           | 0.069            | 0.163             |
| Normoglycaemia – T2D                                     | 0.000           | 0.000            | 0.000             |
| Normoglycaemia – Dead                                    | 0.006           | 0.006            | 0.006             |
| <i>Totals</i>                                            | <i>1.000</i>    | <i>1.000</i>     | <i>1.000</i>      |
| Intermediate hyperglycaemia -Intermediate hyperglycaemia | 0.856           | 0.878            | 0.755             |
| Intermediate hyperglycaemia- Normoglycaemia              | 0.090           | 0.090            | 0.162             |
| Intermediate hyperglycaemia – T2D                        | 0.036           | 0.013            | 0.060             |
| Intermediate hyperglycaemia – Dead                       | 0.019           | 0.019            | 0.023             |
| <i>Totals</i>                                            | <i>1.000</i>    | <i>1.000</i>     | <i>1.000</i>      |
| T2D-T2D                                                  | 0.977           | 0.977            | 0.973             |
| T2D – Normoglycaemia                                     | 0.000           | 0.000            | 0.000             |
| T2D- Intermediate hyperglycaemia                         | 0.000           | 0.000            | 0.005             |
| T2D – Dead                                               | 0.023           | 0.023            | 0.022             |
| <i>Totals</i>                                            | <i>1.000</i>    | <i>1.000</i>     | <i>1.000</i>      |

Notes:

\* Model 1 is based on the transition probabilities from Roberts et al[14] for HbA1c.

\*\* Model 2 is based on Model 1 modified to generate the PHE projections of the prevalence of T2D: the transition probability from intermediate hyperglycaemia to T2D of Model 2 (0.013) is a third of that of Model 1 (0.036); and has a corresponding increase in the transition probability of remaining as intermediate hyperglycaemia (0.836 to 0.878).

\*\*\* Model 3 is based on the transition probabilities from Neuman et al[15] for IGT.

## References

- 1 American Diabetes Association (ADA). 2. Classification and Diagnosis of Diabetes: Standards of Medical Care in Diabetes. *Diabetes Care* 2018;**41**:S13–27.
- 2 World Health Organization (WHO). Definition and diagnosis of diabetes mellitus and intermediate hyperglycemia : report of a WHO/IDF consultation. Geneva (CH): 2006.
- 3 World Health Organization (WHO). Use of glycated haemoglobin (HbA1c) in the diagnosis of diabetes mellitus. 2011.
- 4 Public Health England - National Cardiovascular Intelligence Network. Prevalence estimates of non-diabetic hyperglycaemia. 2015.
- 5 National Cardiovascular Intelligence Network (NCVIN) - Public Health England. Prevalence estimates of diabetes. 2016.
- 6 Office for National Statistics. 2014-based National Population Projections. 2015.
- 7 National Cardiovascular Intelligence Network (NCVIN)- Public Health England. NHS Diabetes Prevention Programme (NHS DPP) Non-diabetic hyperglycaemia. 2015.
- 8 Healthcare Quality Improvement Partnership (HQIP). National Diabetes Audit, 2015-16 Report 2: Complications and Mortality. 2017.
- 9 Huang Y, Cai X, Mai W, *et al*. Association between prediabetes and risk of cardiovascular disease and all cause mortality: systematic review and

- meta-analysis. *BMJ* 2016;**355**:i5953. doi:10.1136/bmj.i5953
- 10 Holman N, Forouhi NG, Goyder E, *et al.* The Association of Public Health Observatories (APHO) Diabetes Prevalence Model: Estimates of total diabetes prevalence for England, 2010-2030. *Diabet Med* 2011;**28**:575–82. doi:10.1111/j.1464-5491.2010.03216.x
  - 11 Moody A, Cowley G, Fat LN, *et al.* Social inequalities in prevalence of diagnosed and undiagnosed diabetes and impaired glucose regulation in participants in the Health Surveys for England series. *BMJ Open* 2016;**6**:e010155. doi:10.1136/BMJOPEN-2015-010155
  - 12 Gatineau M, Hancock C, Holman N, *et al.* Adult obesity and type 2 diabetes. London, UK: 2014.
  - 13 Shaw JEE, Sicree RAA, Zimmet PZZ. Global estimates of the prevalence of diabetes for 2010 and 2030. *Diabetes Res Clin Pract* 2010;**87**:4–14. doi:10.1016/j.diabres.2009.10.007
  - 14 Roberts S, Craig D, Adler A, *et al.* Economic evaluation of type 2 diabetes prevention programmes: Markov model of low- and high-intensity lifestyle programmes and metformin in participants with different categories of intermediate hyperglycaemia. *BMC Med* 2018;**16**:16. doi:10.1186/s12916-017-0984-4
  - 15 Neumann A, Lindholm L, Norberg M, *et al.* The cost-effectiveness of interventions targeting lifestyle change for the prevention of diabetes in a Swedish primary care and community based prevention program. *Eur J Heal Econ* 2017;**18**:905–19. doi:10.1007/s10198-016-0851-9
